# Supplementary material
Source: publisher site journal article supplement (http://static.cambridge.org/content/id/urn:cambridge.org:id:article:S1751731120001287/resource/name/S1751731120001287supp001.xlsx)
Supplement: Supplementary file 1 [file S1751731120001287supp001.xlsx]

## Sheet: Peaks
ID	Peak	Similarity	RT	Count	Mass	C80_182	C80_273	C80_189	C80_261	C80_302	C80_197	MEANC80	C60_274	C60_289	C60_185	C60_180	C60_269	C60_217	MEAN C60	C40_198	C40_264	C40_193	C40_281	C40_265	C40_184	MEAN C40	C20_188	C20_252	C20_253	C20_256	C20_196	C20_254	MEAN C20	QC1	QC2	QC3	QC4	QC5	QC6	MEAN QC
446	Biuret 2	408.033	10.0188,0	30	243	0.014771	0.00766427	0.0064195	0.00495814	0.00358654	0.00401191	0.00690189	0.00861828	0.00770489	0.00425228	0.00340804	0.00458667	0.00350902	0.00534653	0.00661438	0.00749343	0.00670993	0.00770374	0.00542694	0.00361843	0.00626114	0.00979924	0.00947919	0.00725305	0.00754684	0.005948	0.00710714	0.00785558	0.0062893	0.00866778	0.0101559	0.00689155	0.00508471	0.00485942	0.00699144
452	Farnesal 2	293.154	10.0666,0	25	230	4.0831e-06	0.0177284	3.96278e-06	0.0148137	3.37468e-06	0.0149104	0.00791065	0.0192608	3.59881e-06	0.01489	0.0165924	0.016454	0.0163685	0.0139282	0.0175737	0.0228472	0.0168546	0.017247	0.0146084	0.0168141	0.0176575	0.0148829	4.21541e-06	0.0158835	0.0175413	0.0147456	0.0150319	0.0130149	0.0200208	0.0195628	0.0192035	0.0181936	0.0164431	0.0175119	0.0184893
454	gentisic acid	413.167	10.0911,0	24	429	0.000430093	0.0175256	3.96278e-06	0.0191377	0.014117	0.0219679	0.012197	0.0182715	0.00180953	2.89908e-06	0.0169221	0.00131063	2.70643e-06	0.00638656	0.0027078	0.0103611	0.0139745	0.0142805	0.0150467	0.0140577	0.011738	0.0120273	4.21541e-06	0.00115657	0.0165378	2.90571e-06	2.8263e-06	0.00495528	0.00723144	0.0068758	0.00688871	0.00643653	0.00825781	0.00833147	0.00733696
458	2-Deoxy-D-galactose 2	511.931	10.1793,0	30	189	0.0337954	0.0207592	0.0237975	0.0157399	0.0184797	0.0136546	0.0210377	0.0259652	0.0227889	0.0170804	0.0151368	0.016284	0.0111083	0.0180606	0.0257688	0.0230819	0.0185634	0.0153751	0.0127809	0.016964	0.0187557	2.99875e-06	0.0292715	0.025672	0.0207501	0.0146648	0.0186163	0.0181629	0.02052	0.0226915	0.0278334	0.0174949	0.012176	0.00974907	0.0184108
464	alpha-D-glucosamine 1-phosphate	552.154	10.2633,0	30	133	0.190376	0.105414	0.106634	0.0709088	0.0652913	0.0672503	0.100979	0.136249	0.1116	0.0851509	0.0843748	0.0714897	0.05384	0.0904508	0.153962	0.10788	0.140741	0.00837321	0.0803851	0.0563411	0.0912804	0.172571	0.180456	0.130684	0.0926483	0.0675789	0.0894298	0.122228	0.187629	0.191834	0.207668	0.122925	0.0863016	0.0751413	0.14525
465	citric acid	914.5	10.2683,0	30	273	0.0600854	0.095778	0.0403757	0.0641939	0.0317293	0.0639865	0.0593582	0.100518	0.072897	0.0537844	0.120955	0.0575747	0.0579688	0.0772829	0.122095	0.0318462	3.00292e-06	2.76461e-06	0.117004	0.0317171	0.0504447	0.103192	0.219431	0.128791	0.107921	0.0629274	0.109656	0.121986	0.110841	0.110703	0.113746	0.10321	0.110206	0.116136	0.110807
466	isocitric acid 2	508.778	10.2762,0	9	307	0.00200685	2.99742e-06	3.96278e-06	2.52371e-06	0.000992196	0.00145789	0.000744404	3.03245e-06	3.59881e-06	2.89908e-06	2.94078e-06	3.00533e-06	2.70643e-06	3.03048e-06	3.10579e-06	3.71374e-06	3.00292e-06	2.76461e-06	2.43299e-06	3.03563e-06	3.00928e-06	2.99875e-06	4.21541e-06	3.03321e-06	2.96843e-06	2.90571e-06	2.8263e-06	3.15797e-06	0.00194881	0.00215445	0.00195734	3.37784e-06	0.00183366	0.0017652	0.00161047
467	ornithine 1	923.633	10.2896,0	30	142	0.0960895	0.0960472	0.132199	0.0634236	0.0547702	0.0891492	0.0886131	0.0896689	0.069174	0.0709129	0.120352	0.0733679	0.063079	0.0810924	0.0488382	0.0502775	3.00292e-06	0.150997	2.43299e-06	0.0786441	0.0547936	0.091638	0.110012	0.112633	0.119818	0.0664686	0.121807	0.103729	0.0685187	0.0727106	0.0745276	0.0804977	0.0990829	0.107636	0.083829
474	2,8-Dihydroxyquinoline	362.556	10.3882,0	9	291	4.0831e-06	2.99742e-06	0.00350123	0.00243875	3.37468e-06	0.00343574	0.00156436	3.03245e-06	3.59881e-06	2.89908e-06	2.94078e-06	3.00533e-06	2.70643e-06	3.03048e-06	3.10579e-06	3.71374e-06	3.00292e-06	2.76461e-06	0.00205064	3.03563e-06	0.000344376	2.99875e-06	4.21541e-06	3.03321e-06	2.96843e-06	2.90571e-06	2.8263e-06	3.15797e-06	4.10271e-06	0.00257011	0.00270032	0.00236821	0.00245844	0.00234374	0.00207415
476	Tagatose 1	662.474	10.4155,0	21	221	0.00286728	0.00492186	0.00245239	2.52371e-06	0.00463281	2.8178e-06	0.00247995	3.03245e-06	3.59881e-06	0.00141219	0.00518899	0.00169163	0.00155536	0.00164247	0.00296853	0.0044177	3.00292e-06	0.00436204	2.43299e-06	0.00421699	0.00266178	2.99875e-06	4.21541e-06	0.00269075	2.96843e-06	0.00142463	0.00171235	0.000972985	0.000215191	0.000326641	0.000348791	0.00464287	0.00512787	0.00459256	0.00254232
478	beta-Mannosylglycerate 2	972.267	10.4642,0	30	217	0.0282659	2.99742e-06	0.0389909	0.0288214	0.035194	0.0326208	0.027316	0.0364603	0.0237219	0.0199883	0.0324829	0.0301483	0.0262991	0.0281835	0.0280763	0.0362111	0.0214906	0.0322509	0.0290491	0.0293552	0.0294055	0.0128713	0.0393599	0.0393079	0.0188025	0.0279974	0.0243526	0.0271153	0.0395302	0.0384569	0.0391534	0.0351799	0.036487	0.0360722	0.0374799
480	Myristic Acid	785.042	10.5248,0	24	132	0.00365518	0.00399457	3.96278e-06	0.00370822	0.00352522	0.00447405	0.00322687	0.00423635	3.59881e-06	2.89908e-06	0.00454457	0.00302592	0.00296525	0.0024631	0.00317537	0.00530834	0.00450941	0.00369551	2.43299e-06	0.00445011	0.00352353	0.00375415	4.21541e-06	0.0039083	2.96843e-06	0.00346705	0.0039363	0.00251217	0.00883931	0.00888482	0.00860229	0.00765003	0.00823036	0.00823592	0.00840712
483	fructose 1	911.067	10.5389,0	30	103	0.0574642	0.0689686	0.0545093	0.0380683	0.0525197	0.036626	0.0513594	0.0736518	0.100268	0.0330509	0.0491669	0.0389981	0.0359372	0.0551788	0.0646937	3.71374e-06	0.0560726	0.0515746	0.0413645	3.03563e-06	0.0356187	0.0481758	0.0521939	0.0446642	0.05261	0.0331908	0.0331402	0.0439958	0.0871347	0.083588	0.0856829	0.0761037	0.0295014	0.0265025	0.0647522
482	Atrazine-2-hydroxy 3	275.609	10.5585,0	25	297	4.0831e-06	2.99742e-06	3.96278e-06	0.00273022	0.00381288	0.00316265	0.00161947	0.00438625	0.00519944	2.89908e-06	0.00409012	0.00385348	0.00407198	0.00360069	3.10579e-06	0.00440986	0.00298038	0.00288672	0.00239204	0.0046687	0.00289013	2.99875e-06	0.00536031	0.00350317	2.96843e-06	0.00316797	0.0040761	0.00268559	0.00749626	0.00717346	0.00752043	0.00717859	0.0086339	0.00906278	0.00784424
486	mannose 1	916.179	10.6333,0	28	319	0.220546	2.99742e-06	0.239501	0.173585	0.265848	0.264678	0.194027	0.240508	0.314985	2.89908e-06	0.222073	0.203171	0.184338	0.194179	0.170759	0.248541	3.00292e-06	0.16598	0.231137	0.277674	0.182349	0.186767	0.254243	0.260841	0.24303	0.186385	0.249161	0.230071	0.281078	0.275402	0.284803	0.265682	0.25398	1.16968	0.421771
495	Gluconic lactone 2	401.182	10.7406,0	22	201	0.0672696	0.0391057	0.0508359	2.52371e-06	0.0339832	0.0290141	0.0367018	0.0419473	3.59881e-06	0.0389787	0.0311032	0.033	0.0264803	0.0285855	0.0521827	3.71374e-06	3.00292e-06	0.0312544	0.0253267	0.0306219	0.0232321	0.0530892	4.21541e-06	3.03321e-06	0.0324882	2.90571e-06	0.0311371	0.0194541	0.0654206	0.0628093	3.72051e-06	0.0495792	0.0353681	0.0286296	0.0403017
498	tyrosine 2	819.615	10.7663,0	26	179	4.0831e-06	0.0300534	0.0441119	0.0248147	0.0249854	0.0207894	0.0241265	0.0268373	0.034053	0.0330934	0.0318666	0.0316457	0.0230281	0.0300873	0.0201038	0.0301502	0.0373391	0.0282224	0.0321236	0.0226385	0.0284296	0.0297182	0.0424877	0.0333739	0.0347596	0.0258922	0.0316241	0.032976	4.10271e-06	0.03902	3.72051e-06	3.37784e-06	0.0325809	0.0296948	0.0168845
492	D-Talose 2	838.296	10.8135,0	27	205	4.0831e-06	0.848145	1.14228	2.52371e-06	0.959436	0.818177	0.628007	0.843116	1.01674	0.820125	0.843614	0.853897	0.805188	0.86378	0.854386	1.00742	0.859085	0.783972	2.43299e-06	0.867245	0.728686	0.816348	1.16586	0.874947	0.837709	0.797347	0.803168	0.882564	3.42538	1.03764	3.72051e-06	1.00102	1.16237	1.10897	1.28923
500	lysine	827.857	10.8541,0	28	156	0.033791	0.0393081	0.0505459	0.02424	0.0219917	0.0222633	0.0320233	0.0351703	0.0248209	0.016205	0.0413879	0.0267738	0.0155719	0.026655	0.015907	0.0201219	3.00292e-06	0.0583704	2.43299e-06	0.0296548	0.0206766	0.0370544	0.0397817	0.0280086	0.0481428	0.0279421	0.0568481	0.0396296	4.10271e-06	0.0154686	0.0160128	0.0191198	0.00707677	2.6297e-06	0.00961412
508	tyrosine 1	880.4	10.9496,0	30	218	0.0410712	0.0498147	0.05479	0.0378976	0.0304353	0.033285	0.0412156	0.0391632	0.0358735	0.0206894	0.0648365	0.0414389	0.0365034	0.0397508	0.0176419	0.0258594	3.00292e-06	0.0699326	2.43299e-06	0.042314	0.0259589	0.0297274	0.048577	0.053562	0.0783521	0.0243516	0.0736003	0.0513617	0.0460941	0.0500438	0.0518701	0.0603486	0.0671739	0.0743689	0.0583166
510	glucuronic acid 2	681.069	10.991,0	29	169	0.00547165	0.00652729	0.00692273	0.00531283	0.00837421	0.00806983	0.00677976	0.00556232	0.00727889	0.00442209	0.00714521	0.00637947	0.00788628	0.00644571	0.00330413	0.00591159	0.00740359	0.00673644	0.00809316	0.00870801	0.00669282	0.00343846	0.00709152	0.00549121	0.00853594	0.00625208	0.00719199	0.00633353	0.00628984	0.00548287	0.00485629	3.37784e-06	0.00791487	0.00907624	0.00560391
514	conduritol b epoxide 2	488.68	11.054,0	26	191	0.00219643	2.99742e-06	0.00174115	0.001104	0.00926859	2.8178e-06	0.002386	0.0255366	3.59881e-06	0.00105307	0.00183247	0.00128501	0.00186819	0.00526315	0.00726083	3.71374e-06	3.00292e-06	2.76461e-06	0.00316401	0.00638409	0.00280307	0.00568352	0.00265936	0.0167215	2.96843e-06	0.00172829	0.00146199	0.00470961	0.0829536	0.0761619	0.0764329	3.37784e-06	0.00146718	0.00172464	0.0397906
518	3,5-Dihydroxyphenylglycine 1	217.667	11.1111,0	10	146	4.0831e-06	0.000502181	3.96278e-06	2.52371e-06	3.37468e-06	2.8178e-06	8.64905e-05	0.000859471	0.000821252	2.89908e-06	2.94078e-06	3.00533e-06	2.70643e-06	0.000282046	0.000384753	3.71374e-06	0.000402663	0.000369725	2.43299e-06	3.03563e-06	0.000194387	2.99875e-06	4.21541e-06	3.03321e-06	2.96843e-06	2.90571e-06	2.8263e-06	3.15797e-06	4.10271e-06	0.000297467	0.000421971	0.000307279	2.8278e-06	2.6297e-06	0.000172713
520	canavanine 1	247.429	11.1481,0	21	188	4.0831e-06	2.99742e-06	0.000448687	2.52371e-06	0.000647829	2.8178e-06	0.000184823	0.000824718	0.00134538	0.000542618	2.94078e-06	0.0012181	0.00119692	0.000855113	0.000491028	0.00101832	0.000610761	0.000657257	2.43299e-06	3.03563e-06	0.000463806	0.00066991	0.00239168	0.00108727	2.96843e-06	0.000486889	2.8263e-06	0.000773591	0.00438449	0.00370061	0.00396432	0.00369923	0.00405311	0.0036823	0.00391401
525	Galactonic acid	303.708	11.2524,0	30	293	0.00116928	0.00177095	0.00109031	0.00160834	0.00125029	0.000852416	0.00129026	0.00163608	0.00129746	0.000700937	0.00134977	0.000924717	0.00111204	0.00117017	0.00154854	0.00226257	0.00107154	0.000743578	0.000760552	0.000957616	0.00122407	0.00168957	0.00108161	0.000848473	0.00101189	0.000716272	0.000733051	0.00101348	0.000982835	0.0010582	0.000889478	0.000971711	0.00115543	0.00111334	0.0010285
529	gluconic acid 1	577	11.3131,0	30	204	0.0123929	0.00987966	0.0122446	0.00895615	0.0121672	0.0114775	0.0111863	0.0105306	0.0120634	0.00886059	0.00981972	0.0104704	0.0116824	0.0105712	0.00823231	0.0105718	0.0103128	0.00931592	0.0100984	0.011851	0.0100637	0.00923913	0.0126975	0.0108157	0.0114917	0.0094997	0.0109332	0.0107795	0.0119009	0.0111406	0.011708	0.0107752	0.0104579	0.0111376	0.0111867
528	palmitoleic acid	391	11.3249,0	29	132	4.0831e-06	0.000781665	0.00104648	0.000580442	0.000700186	0.000907562	0.00067007	0.000808204	0.000953523	0.000808002	0.000676528	3.00533e-06	0.00066609	0.000652559	3.10579e-06	0.000738726	0.000794215	0.000769165	0.000673781	0.000848699	0.000637949	2.99875e-06	0.00114421	0.000960882	2.96843e-06	0.000686789	0.000759742	0.000592931	0.000722739	0.000205483	0.00087663	0.000847189	0.000766868	0.000670332	0.00068154
536	palmitic acid	975	11.4903,0	30	117	0.133297	0.124231	0.164471	0.116618	0.112806	0.129744	0.130195	0.124912	0.169121	0.139933	0.145006	0.102329	0.132003	0.135551	0.120121	0.174114	0.123141	0.120789	0.0976133	0.117829	0.125601	0.11709	0.161463	0.114147	0.139818	0.130978	0.131036	0.132422	0.164969	0.184007	0.19637	0.185568	0.151678	0.145714	0.171384
537	Glucosaminic acid	481.357	11.4909,0	16	100	4.0831e-06	0.000771699	3.96278e-06	2.52371e-06	0.000745007	2.8178e-06	0.000255016	3.03245e-06	0.000944006	2.89908e-06	2.94078e-06	3.00533e-06	2.70643e-06	0.000159765	3.10579e-06	3.71374e-06	0.000668354	0.000666207	2.43299e-06	0.000761399	0.000350869	2.99875e-06	4.21541e-06	3.03321e-06	2.96843e-06	2.90571e-06	0.000640497	0.000109436	0.00123772	0.00135621	0.00146011	0.00171949	0.000968744	0.000748304	0.00124843
545	Glucoheptonic acid 2	505.5	11.5693,0	30	257	0.00174175	0.000947953	0.000740427	0.000356274	0.000378076	0.000461107	0.000770931	5.72949e-05	0.000922547	0.000783778	0.000419583	0.000327361	0.000378708	0.000481545	0.00140519	0.00168959	0.000740763	0.000597553	0.000350708	0.000313294	0.000849516	2.99875e-06	0.00111563	0.000809715	0.000585125	0.00043678	0.000368069	0.000553053	0.00216831	0.00211176	0.00236668	0.00113585	0.00038357	0.000302423	0.00141143
548	myo-inositol	944.167	11.6685,0	30	217	0.0538111	0.0420851	0.0519369	0.0380124	0.0386853	0.0468261	0.0452261	0.050421	0.043355	0.0520885	0.0475089	0.0488391	0.0354111	0.0462706	0.0378238	0.0582105	0.0590298	0.0533157	0.0518982	0.0463558	0.0511056	2.99875e-06	0.05241	0.0524272	0.0446723	0.0576956	0.0355588	0.0404612	0.0560745	0.0508531	0.0518048	0.0491907	0.0413201	0.0414845	0.0484546
554	N-Acetyl-beta-D-mannosamine 4	380.889	11.7907,0	27	55	0.00170875	0.00182381	0.00238781	0.00133184	0.00155545	0.00139712	0.0017008	0.00153469	0.00196352	0.00162691	2.94078e-06	0.00168666	2.70643e-06	0.00113624	0.00166284	0.0017392	0.00177104	0.00156888	0.00125475	0.00189081	0.00164792	0.00165824	0.00180499	0.00163399	2.96843e-06	0.00163558	0.0016708	0.0014011	0.00292219	0.00271767	0.00271263	0.00301258	2.8278e-06	2.6297e-06	0.00189509
558	d-Glucoheptose 1	562.333	11.8597,0	6	205	0.000898208	2.99742e-06	3.96278e-06	2.52371e-06	0.000702413	0.000473327	0.000347239	3.03245e-06	3.59881e-06	2.89908e-06	2.94078e-06	3.00533e-06	2.70643e-06	3.03048e-06	3.10579e-06	3.71374e-06	3.00292e-06	2.76461e-06	2.43299e-06	3.03563e-06	3.00928e-06	2.99875e-06	4.21541e-06	3.03321e-06	2.96843e-06	2.90571e-06	2.8263e-06	3.15797e-06	4.10271e-06	0.000500859	0.000483159	3.37784e-06	0.000281449	2.6297e-06	0.000212596
562	heptadecanoic acid	916.833	11.9601,0	30	117	0.00728233	0.00649219	0.00792545	0.00547586	0.00577745	0.00622115	0.00652907	0.00655592	0.00865312	0.00683852	0.00715299	0.00567985	0.00617918	0.00684327	0.00583596	0.00884082	0.00662555	0.00668829	0.00531285	0.00640998	0.00661891	0.00619686	0.00994764	0.00701849	2.96843e-06	0.00734794	0.00692371	0.0062396	0.00584935	0.00858151	0.00922283	0.0100385	0.00860247	0.00845757	0.00845871
563	noradrenaline	574.333	12.0163,0	30	174	0.00357649	0.001139	0.0030177	0.00227677	0.00175663	2.8178e-06	0.00196157	0.00166675	0.00152432	0.000930863	0.00147693	0.00245087	0.00133451	0.00156404	0.00129768	0.00187085	0.0012103	0.00164011	0.00150785	0.00210533	0.00160535	0.000739183	0.000657532	0.00111767	0.00145244	0.00108033	0.00130277	0.00105832	0.00181213	0.00185192	0.00167892	0.00187181	0.00279623	0.00352865	0.00225661
565	Indolelactate 2	815.967	12.0998,0	30	202	0.00210307	0.00247497	0.00268614	0.00201915	0.00171132	0.00162117	0.00210264	0.00180605	0.00165363	0.00247662	0.00205002	0.00271496	0.00281626	0.00225292	0.00154278	0.00256647	3.00292e-06	0.00183212	2.43299e-06	0.00136674	0.00121892	0.00246346	0.00220405	0.00155483	0.0028647	0.000868641	0.00185828	0.00196899	0.00250099	0.00235387	0.0023471	0.00228948	0.00189181	0.00196985	0.00222552
572	Fructose 2,6-biphosphate degr prod 2	624.467	12.2104,0	30	211	0.00236972	0.00452715	0.00419238	0.0038388	0.00400292	0.00270311	0.00360568	0.00364312	0.00408556	0.00264041	0.00490042	0.00288296	0.00355502	0.00361791	0.00358212	0.00394595	0.00585931	0.00383664	0.00364667	0.00418105	0.00417529	0.00475513	0.00521433	0.00426401	0.00514113	0.00311811	0.00333312	0.0043043	0.00226991	0.00195819	0.00228089	0.00193985	0.00170521	0.00167405	0.00197135
577	linoleic acid	799.273	12.27,0	11	150	0.00253167	2.99742e-06	3.96278e-06	0.00181147	0.0023946	2.8178e-06	0.00112459	3.03245e-06	3.59881e-06	0.00325363	0.00331377	3.00533e-06	2.70643e-06	0.00109662	3.10579e-06	3.71374e-06	3.00292e-06	2.76461e-06	0.00242611	3.03563e-06	0.000406955	2.99875e-06	4.21541e-06	3.03321e-06	2.96843e-06	2.90571e-06	2.8263e-06	3.15797e-06	0.00194738	0.00188721	0.00205081	0.00226248	2.8278e-06	0.00175152	0.00165037
580	oleic acid	905.286	12.2933,0	28	117	0.0240572	0.0393768	0.0358253	0.0218947	3.37468e-06	0.041465	0.0271037	0.0265885	0.0422853	2.89908e-06	0.0397365	0.0244005	0.0296761	0.027115	0.0300055	0.0431987	3.00292e-06	0.0165549	0.0302631	0.0270064	0.0245053	0.0277799	0.0589142	0.0264963	0.0480144	0.0560618	0.0325403	0.0416345	0.0293319	0.0312936	0.0331374	0.0383761	0.0327349	0.0301931	0.0325112
581	tryptophan 1	828.92	12.2967,0	25	202	4.0831e-06	0.0494587	3.96278e-06	0.0433924	0.0529352	0.0404084	0.0310338	3.03245e-06	3.59881e-06	0.0462935	0.0445109	0.0458758	0.0730883	0.0349625	0.0241503	0.0283232	3.00292e-06	0.0828363	2.43299e-06	0.0680371	0.0338921	2.99875e-06	0.0439258	0.0585049	0.0664282	0.0331767	0.0618882	0.0439878	0.0442384	0.0361354	0.0351073	0.0459541	0.0455518	0.051389	0.0430627
584	stearic acid	967.6	12.3987,0	30	117	0.244418	0.231889	0.300152	0.214089	0.216399	0.274979	0.246988	0.218955	0.330541	0.215409	0.281542	0.180903	0.205318	0.238778	0.199278	0.303128	0.244752	0.254019	0.198324	0.235413	0.239152	0.204557	0.297653	0.20129	0.256867	0.197661	0.255073	0.235517	0.217274	0.259473	0.289827	0.323331	0.272924	0.26052	0.270558
611	arachidonic acid	682.95	12.9974,0	23	80	4.0831e-06	0.00213506	0.00229482	2.52371e-06	3.37468e-06	0.00204049	0.00108006	3.03245e-06	3.59881e-06	0.0014231	0.00237626	3.00533e-06	0.00190573	0.000952455	0.00141158	0.00229929	0.00224126	0.00170083	0.00182982	0.00259762	0.0020134	0.000951998	0.00152004	0.00173363	0.00291903	2.90571e-06	0.00129606	0.00140394	0.00055306	0.00132622	0.00144872	0.0019055	0.0017363	0.00171994	0.00144829
614	6-phosphogluconic acid	637.31	13.0986,0	29	318	0.00226546	0.00188786	0.00260987	0.00156229	0.00152242	0.0014919	0.00188997	0.00189815	3.59881e-06	0.00101957	0.00180788	0.00150775	0.00126233	0.00124988	0.00254416	0.00244529	0.00150077	0.00136984	0.00126043	0.00163425	0.00179246	0.00131182	0.00155075	0.00145342	0.001921	0.00126897	0.00121968	0.00145427	0.000922482	0.001079	0.000873352	0.000783816	0.000847418	0.000654511	0.000860096
621	uridine 2	459.238	13.2384,0	27	285	0.00434128	2.99742e-06	0.00437392	0.00172358	0.00244174	2.8178e-06	0.00214772	0.00247684	0.0035868	0.00138522	0.00170226	0.00258876	0.00197609	0.002286	0.00233908	0.00421212	3.00292e-06	0.00370335	2.43299e-06	0.0027364	0.00216606	0.00160682	0.00319241	0.00403649	2.96843e-06	0.00336406	0.00237656	0.00242989	0.00287872	0.00298783	0.00296137	0.00265302	0.00251973	0.00267508	0.00277929
622	cytidine-monophosphate degr prod	427.407	13.251,0	28	271	0.0050812	0.00303134	0.00287239	0.00163007	3.37468e-06	2.8178e-06	0.00210353	0.0035437	0.00326692	0.00237943	0.00175367	0.00180082	0.00115661	0.00231686	0.00393976	0.00406686	0.00220992	0.00181467	0.00126263	0.00137541	0.00244487	0.00461517	0.00420187	0.00279584	0.00215125	0.00176778	0.00160291	0.0028558	0.00734015	0.00739016	0.00772945	0.00486834	0.00252165	0.00166081	0.00525176
623	D-erythro-sphingosine 1	644.481	13.2748,0	27	204	0.00186276	0.00184387	0.00210735	0.00190099	0.00243734	0.00185349	0.00200097	0.00277824	0.00355786	0.00173572	0.00231476	0.00252104	0.00223896	0.00252443	3.10579e-06	0.003081	0.00230033	0.00152479	0.00151271	0.00288919	0.00188519	0.00145958	0.00355906	0.00218635	0.00256369	2.90571e-06	0.00261163	0.00206387	4.10271e-06	0.00440305	0.00441088	0.00496726	0.00492002	0.00491941	0.00393745
625	salicin	476.615	13.4388,0	26	446	0.000351879	0.000763422	0.000931772	0.000502034	0.000399785	0.00073175	0.00061344	0.000432146	0.000434154	0.000303164	0.000412716	0.000412767	0.00028774	0.000380448	0.000527549	0.000620761	3.00292e-06	2.76461e-06	0.00024131	0.000613025	0.000334736	0.00031384	4.21541e-06	0.000330867	2.96843e-06	0.000441972	0.000471274	0.000260856	0.000523209	0.00043999	0.000701956	0.00036048	0.000516053	0.000469815	0.000501917
632	piceatannol 2	459.885	13.6013,0	28	221	0.00263431	0.00434521	0.00220895	0.00471825	0.00392879	0.00495815	0.00379894	0.00578589	0.00218497	0.00165367	0.00467302	0.00173441	0.0016213	0.00294221	0.00234955	0.00379086	0.00402674	0.00429895	0.00440026	0.00383062	0.00378283	0.0033927	0.0024572	3.03321e-06	0.00456888	0.00142719	0.00159982	0.00224147	0.00433965	0.00392008	0.00417849	0.00435595	2.8278e-06	0.00388657	0.00344726
635	arbutin	722.643	13.6497,0	16	361	0.00516383	0.00236597	0.00226839	0.00134652	4.19806e-05	0.000665393	0.00197535	0.00309221	0.00197078	0.00182065	0.00101372	3.00533e-06	2.70643e-06	0.00131718	3.10579e-06	3.71374e-06	3.00292e-06	2.76461e-06	2.43299e-06	3.03563e-06	3.00928e-06	2.99875e-06	4.21541e-06	3.03321e-06	2.96843e-06	2.90571e-06	2.8263e-06	3.15797e-06	0.00505621	0.00173307	0.00823366	0.00302414	0.00132022	0.000200539	0.00326131
639	1-Monopalmitin	856.8	13.8144,0	30	371	0.00134138	0.00120238	0.00110779	0.000890324	3.37468e-06	0.00111225	0.000942916	0.00107343	0.00150844	0.00153525	0.00133401	0.00116866	0.00107596	0.00128263	0.000883741	0.00102305	0.00127103	0.0011089	0.00119675	0.00131822	0.00113361	0.00102942	0.00167763	0.00105454	0.00143754	0.00103678	2.8263e-06	0.00103979	0.00149923	0.00119946	0.00127902	0.00143688	0.00146161	0.00140473	0.00138016
647	sucrose	855.519	13.9857,0	29	361	0.00267681	0.00135324	0.00166216	0.0011469	0.000640927	0.000779059	0.00137652	0.00177026	0.00187948	0.00150091	0.00100475	3.00533e-06	0.000795511	0.00115899	0.00231761	0.00193495	0.00128621	0.000978386	0.00134792	0.000191366	0.00134274	2.99875e-06	0.00163013	0.00174567	0.00104502	2.90571e-06	0.00148867	0.000985901	0.00319374	0.00343024	0.00413106	0.00203831	0.00140006	0.000728996	0.00248707
649	xanthosine	415.5	14.1771,0	26	221	4.0831e-06	0.00343003	0.0018622	0.00367679	0.00365976	0.00417911	0.002802	0.00464025	0.00186958	0.0014642	0.00410462	0.00152256	0.00145713	0.00250972	0.00202165	0.00296973	0.00335084	0.00331931	2.43299e-06	0.00322822	0.00248203	0.00278594	0.00234021	3.03321e-06	0.00390978	0.0012338	2.8263e-06	0.0017126	0.00377006	0.00348586	0.00351945	0.00347965	0.00335407	0.00338633	0.00349924
653	resveratrol 1	405.25	14.4501,0	21	221	4.0831e-06	0.0109643	3.96278e-06	0.0126932	0.00897663	0.0144318	0.00784566	3.03245e-06	0.000550483	2.89908e-06	0.0108439	0.000654911	2.70643e-06	0.00200965	3.10579e-06	0.00567628	0.00849294	0.0087972	0.0090349	0.00828102	0.00671424	0.00666799	4.21541e-06	0.0004701	0.0102223	2.90571e-06	2.8263e-06	0.00289505	0.00327754	0.00310383	0.00318115	0.00299555	0.00379032	0.00374995	0.00334972
654	trehalose	938.7	14.5029,0	30	361	0.0102974	0.00786882	0.0119746	0.00806551	0.00698527	0.00599273	0.00853072	0.0106054	0.00900691	0.00396014	0.00616943	0.00583009	0.00564776	0.00686995	0.00787431	0.0106787	0.00928669	0.00802963	0.00846283	0.0102304	0.00909375	0.0067765	0.00926103	0.00513222	0.00852572	0.00746801	0.00811439	0.00754631	0.00952464	0.00888973	0.00874876	0.00872947	0.00883238	0.0053832	0.00835136
657	maltose	675.4	14.569,0	10	361	0.0036431	2.99742e-06	0.00293814	0.00239644	0.00352462	2.8178e-06	0.00208469	3.03245e-06	3.59881e-06	2.89908e-06	2.94078e-06	3.00533e-06	2.70643e-06	3.03048e-06	3.10579e-06	3.71374e-06	3.00292e-06	2.76461e-06	2.43299e-06	3.03563e-06	3.00928e-06	2.99875e-06	4.21541e-06	3.03321e-06	2.96843e-06	2.90571e-06	2.8263e-06	3.15797e-06	0.00335062	0.00307802	0.00350139	0.00333583	0.00386511	0.0053832	0.00375236
659	Digalacturonic acid 4	518.812	14.6245,0	16	73	0.00346008	2.99742e-06	0.00315784	2.52371e-06	0.0019887	0.00270794	0.00188668	3.03245e-06	3.59881e-06	0.00285176	2.94078e-06	0.00349262	2.70643e-06	0.00105944	0.00256398	3.71374e-06	0.0174752	2.76461e-06	2.43299e-06	0.00159005	0.00360636	0.00319088	4.21541e-06	3.03321e-06	2.96843e-06	2.90571e-06	0.00914438	0.00205806	4.10271e-06	0.00480198	0.00510832	3.37784e-06	2.8278e-06	0.0114042	0.00355414
660	Sophorose 2	830.69	14.7298,0	29	217	0.00869836	0.00638487	0.00548814	0.00356056	0.00408775	0.00367999	0.00531661	0.00695821	0.00583454	0.00390756	0.00381144	0.00520454	0.00361717	0.00488891	0.00712927	0.00682375	0.00497379	0.00414248	0.00325123	3.03563e-06	0.00438726	0.00715132	0.0060292	0.00526716	2.96843e-06	0.00350174	0.00316908	0.00418691	0.0123865	0.0120049	0.0120742	0.00693197	0.00406105	0.00450844	0.00866117
662	maltitol	552.278	14.8465,0	22	73	4.0831e-06	0.0212013	0.0158714	0.00645048	0.0183928	0.0187684	0.0134481	3.03245e-06	0.0192622	2.89908e-06	0.00674572	0.0105986	2.70643e-06	0.00610252	0.0173783	3.71374e-06	0.023907	0.00615183	0.00819882	0.0216625	0.0128837	0.0117435	4.21541e-06	0.00439086	0.0128573	0.00336391	2.8263e-06	0.00539377	4.10271e-06	0.0209122	0.00974668	0.0256954	0.0286594	0.0288571	0.0189792
664	prunin degr. Prod. 1	535.75	14.9909,0	28	73	0.00290219	2.99742e-06	0.00989855	0.00562445	0.00653729	0.00545063	0.00506935	0.0132777	0.0154107	0.00859608	0.011547	0.0120417	0.00699396	0.0113112	0.00559415	0.0188168	0.0119306	0.00292745	0.0143145	0.00804423	0.0102713	0.00856963	0.0112349	0.00685154	0.0151174	0.00477734	0.00619875	0.0087916	0.00640705	0.0068181	3.72051e-06	0.00952447	0.0107389	0.0126176	0.00768496
665	4-Androsten-19-ol-3,17-dione 1	475.188	15.1124,0	22	73	0.00584483	2.99742e-06	0.00465091	2.52371e-06	3.37468e-06	0.00179487	0.00204992	3.03245e-06	3.59881e-06	0.00493881	2.94078e-06	0.00455842	2.70643e-06	0.00158492	0.00273983	0.00598727	3.00292e-06	0.000538774	2.43299e-06	3.03563e-06	0.00154572	0.00278626	0.00438654	0.00461572	0.00404833	2.90571e-06	0.00298339	0.00313719	0.0227577	0.016536	0.0179592	0.00195833	0.00124204	0.00337466	0.010638
27	2-hydroxypyridine	907.333	5.22719,0	30	152	0.46068	0.347803	0.463506	0.332342	0.401826	0.338487	0.390774	0.381391	0.438662	0.345909	0.350105	0.383229	2.70643e-06	0.31655	0.357264	0.445997	0.367024	0.315943	0.320532	0.365834	0.362099	0.39723	0.54028	0.423247	0.373396	0.341416	0.346057	0.403604	0.357801	0.396813	0.408416	0.353186	0.288589	0.310683	0.352581
33	Pyruvic acid	867.815	5.27664,0	27	174	0.0494303	0.0339107	0.0327362	0.0290938	0.0438839	0.0458437	0.0391498	0.0388612	0.0455047	0.0264642	0.030906	0.0306609	0.0271831	0.0332634	0.0278356	0.0262908	0.0336969	0.0362116	2.43299e-06	0.0333455	0.0262305	0.0283888	0.040365	0.0327039	0.0461029	0.0217067	0.0340244	0.0338819	4.10271e-06	0.054306	3.72051e-06	0.0500146	0.0477227	0.0537053	0.0342927
36	lactic acid	904.433	5.32672,0	30	219	0.238243	0.143043	0.175762	0.124914	0.210588	2.8178e-06	0.148759	0.166794	0.181829	2.89908e-06	0.120888	0.154504	0.136777	0.126799	0.159349	0.210255	0.162713	0.132032	0.172467	0.222969	0.176631	0.126033	0.200138	0.196907	0.146442	0.155629	0.168847	0.165666	0.216852	0.216823	0.218362	0.207256	0.184453	0.184219	0.204661
51	glycolic acid	939.067	5.45342,0	30	177	0.0156551	0.00715623	0.0126914	0.00573973	0.00611555	0.00586997	0.00887132	0.00815486	0.008048	0.00603547	0.00653403	0.00885259	0.00696468	0.0074316	0.01105	0.00858277	0.0059356	0.00643317	0.00553636	0.00671246	0.00737506	0.00883365	0.00856126	0.00758616	0.00884726	0.00562564	0.00840671	0.00797678	0.0112644	0.0118195	0.0128401	0.00840123	0.00871952	0.00934773	0.0103987
62	alanine 1	958.833	5.65594,0	30	116	1.14521	0.978549	1.31177	0.737212	0.716653	0.853777	0.957195	0.72295	0.900076	0.521856	0.808598	0.969719	0.822011	0.790868	0.808154	0.789296	1.29093	1.01603	2.43299e-06	0.77568	0.780015	0.915935	1.26472	1.15378	1.07861	0.688795	0.990089	1.01532	0.628622	0.717199	0.759319	0.802873	0.818559	0.870665	0.766206
64	2-ketobutyric acid 1	365.158	5.66194,0	21	120	0.00440966	2.99742e-06	0.00473618	0.00287542	0.00374376	0.00413627	0.00331738	0.00323824	3.59881e-06	0.00240357	0.00377769	3.00533e-06	0.00295428	0.0020634	0.00308724	0.00301236	0.00389656	2.76461e-06	2.43299e-06	3.03563e-06	0.0016674	2.99875e-06	0.00423915	0.00409879	2.96843e-06	0.00333283	0.00345826	0.0025225	4.10271e-06	0.00300022	0.000957051	0.00089205	0.000943746	0.00118984	0.0011645
73	hydroxylamine	927.733	5.77797,0	30	133	0.0741479	0.04788	0.0821219	0.0605387	0.0830185	0.0705122	0.0697032	0.0552641	0.0588491	0.0543377	0.0694506	0.0726625	0.0599239	0.061748	0.0434166	0.0416283	0.0618212	0.0493022	0.0586753	0.0734199	0.0547106	0.0485024	0.0553076	0.0526973	0.0570609	0.0549965	0.0598899	0.0547424	0.0493762	0.0509516	0.0536804	0.0555039	0.0575801	0.060728	0.0546367
76	glycine 1	884.5	5.80544,0	30	102	0.0836483	0.194363	0.0818845	0.03742	0.0383041	0.0314867	0.0778511	0.0554374	0.0641347	0.0551118	0.0418113	0.0262658	0.0306846	0.0455743	0.105499	0.0334607	0.111243	0.135372	0.0854795	0.0393741	0.0850713	0.173313	0.199009	0.122384	0.150475	0.100355	0.0941768	0.139952	0.0528156	0.0576033	0.0571585	0.0309543	0.0139172	0.00931049	0.0369599
78	2-hydroxybutanoic acid	933.467	5.82386,0	30	131	0.0194216	0.0282974	0.0345728	0.0208251	0.0229307	0.017592	0.0239399	0.042127	0.0274863	0.0209124	0.0197418	0.023437	0.0262926	0.0266662	0.0349405	0.037765	0.028994	0.043388	0.0354537	0.0281775	0.0347865	0.0276569	0.0504114	0.0393773	0.0417651	0.0250138	0.0251545	0.0348965	0.0316188	0.0341476	0.035512	0.0302394	0.0281327	0.0305418	0.0316987
89	3-Hydroxypropionic acid 1	526.414	5.93914,0	29	267	0.00743694	0.00632081	0.00672839	0.00455635	0.00556974	0.00464804	0.00587671	0.00500758	0.00517696	2.89908e-06	0.00431098	0.00430337	0.00440026	0.00386701	0.00542672	0.00608902	0.00531007	0.00506655	0.00525932	0.0046323	0.00529733	0.00607465	0.00596352	0.00468604	0.00463405	0.00445471	0.00412261	0.00498926	0.00500568	0.00471841	0.00493975	0.00429065	0.00309751	0.00287475	0.00415446
99	3-hydroxybutyric acid	924.167	6.07789,0	30	117	4.0831e-06	0.924537	1.11977	2.52371e-06	1.09071	0.760956	0.64933	1.00516	0.870818	0.518247	0.697343	0.827813	0.780994	0.783396	0.681188	0.875513	0.787162	0.984556	0.656088	0.86129	0.807633	0.552126	1.05395	0.832689	0.689767	0.61838	0.61333	0.726706	0.888546	0.950904	0.971902	0.88519	0.798204	0.817611	0.885393
102	p-cresol	748.036	6.13301,0	28	165	0.333981	0.155668	0.303944	0.154025	0.215276	0.228482	0.231896	0.133655	0.180829	0.095355	0.268784	0.24978	0.163046	0.181908	0.218394	0.229719	0.205822	0.140738	0.169421	0.138277	0.183728	0.176485	0.19309	0.152101	0.158104	0.165912	0.160091	0.167631	4.10271e-06	3.74125e-06	0.272203	0.251352	0.225723	0.24095	0.165039
108	N-Methyl-DL-alanine	847.767	6.176,0	30	130	0.0314387	0.0450082	0.0678132	0.0418655	0.035278	0.0374373	0.0431401	0.0555708	0.0659526	0.0379335	0.056023	0.0480595	0.0564834	0.0533371	0.0463894	0.0500468	0.0766552	0.0508094	2.43299e-06	0.0447597	0.0447772	0.0517531	0.101362	0.064697	0.0695689	0.0465032	0.0554132	0.0648829	0.0416534	0.0449164	0.0465449	0.0436924	0.0468804	0.0541882	0.0463126
116	alpha-ketoisocaproic acid 2	647.759	6.23227,0	29	89	0.00619887	0.00662763	0.00902631	0.00699019	0.00843776	0.00522338	0.00708402	0.0092253	0.00893105	0.00718788	0.00767842	0.00704906	0.00642252	0.00774904	0.00516679	3.71374e-06	0.0109053	0.00964846	0.007879	0.00750542	0.00685145	0.00893158	0.0126537	0.0104517	0.010141	0.00745717	0.00781852	0.00957561	0.00919027	0.00976325	0.0103183	0.00943556	0.00919489	0.0101597	0.00967699
118	Methyl Phosphate	810.333	6.25881,0	30	241	0.0124568	0.0122892	0.0156749	0.0104373	0.0160275	0.0128711	0.0132928	0.0124725	0.0148099	0.0105352	0.0155085	0.0122728	0.0116312	0.0128717	0.00988437	0.0158161	0.0151076	0.0130254	0.0131206	0.0167423	0.0139494	2.99875e-06	0.013582	0.0123086	2.96843e-06	0.0129948	0.0118418	0.00845552	0.00509478	0.00820761	0.010554	0.0117745	0.0119652	0.0105073	0.0096839
131	malonic acid 1	600.828	6.39066,0	29	174	0.00117685	0.00180788	0.00135259	0.000914364	0.00126642	0.00109545	0.00126893	0.00132937	0.00155423	0.000931129	0.00107031	0.00133665	0.00128263	0.00125072	0.00113692	0.00130482	0.00182194	0.00174961	0.00134168	0.00120053	0.00142592	0.00180109	0.00265125	0.00201418	0.00203968	0.00180638	0.00203395	0.00205775	0.00197684	0.00220624	0.00223119	0.00184682	2.8278e-06	0.00185015	0.00168568
135	2-Hydroxyvaleric acid	724.3	6.45636,0	30	131	0.00381211	0.00236861	0.003581	0.00257562	0.00262269	0.00200919	0.0028282	0.00343005	0.00290271	0.0023311	0.00283817	0.00249198	0.00226522	0.00270987	0.00308201	0.00348329	0.00242477	0.00245139	0.00202643	0.00240042	0.00264472	0.00276511	0.00281429	0.002891	2.96843e-06	0.00238943	0.00210691	0.00216162	0.00324998	0.00337757	0.00360759	0.00303602	0.00295677	0.00324707	0.00324584
138	valine	956.067	6.49683,0	30	144	0.899697	0.754907	1.13128	0.643152	0.70703	0.609191	0.790876	0.836912	0.870562	0.691916	0.760387	0.739222	0.678572	0.762928	0.677255	0.792306	1.19119	0.894466	0.867195	0.928954	0.891895	0.979529	1.15199	1.03696	1.05595	0.67719	0.92831	0.971656	0.882235	0.917641	0.948681	0.851283	0.859315	0.845932	0.884181
140	Methylmalonic acid	427.88	6.51228,0	30	281	0.0114301	0.00869506	0.008514	0.00664393	0.00759584	0.00625767	0.00818943	0.00874035	0.00729915	0.00623416	0.00588197	0.00584218	0.00479584	0.00646561	0.0091691	0.00887281	0.00713162	0.005984	0.00611644	0.0061964	0.00724506	2.99875e-06	0.00892336	0.00736195	0.0066117	0.00498573	0.00558339	0.00557819	0.0214684	0.0213687	0.0228859	0.0197357	0.022261	0.0236761	0.0218993
142	canavanine degr prod	274.346	6.55261,0	30	174	0.00318133	0.00311505	0.00407579	0.00300259	0.00339061	0.00299724	0.00329377	0.00344497	0.00358005	0.00264568	0.00297226	0.00292859	2.70643e-06	0.00259571	0.00302776	0.00370197	0.00314515	0.00308839	0.00281643	0.00301773	0.0031329	0.00328777	0.00374172	0.00283019	0.00343216	0.00246797	0.00260114	0.00306016	0.00387541	0.00426715	0.00447146	0.00390184	0.00340943	0.00368167	0.00393449
151	hydroxyurea	804.815	6.62824,0	27	277	0.00184425	0.00185409	0.00186295	0.00206767	0.00276163	0.00215511	0.00209095	0.00275228	0.00271108	0.00158459	2.94078e-06	0.00225181	0.00233708	0.00193996	0.00140941	0.00254338	0.00191324	0.0015938	0.00153672	0.00253188	0.0019214	0.00182249	0.00271029	0.00213975	0.0028185	0.00144515	0.00183217	0.00212806	4.10271e-06	0.00339457	3.72051e-06	0.00357514	0.00451195	0.00488654	0.00272934
152	4-hydroxybutyrate	555	6.639,0	30	205	4.0831e-06	0.00368746	0.00346429	0.00305443	0.00321208	0.00329527	0.00278627	3.03245e-06	0.00242712	0.00223242	0.00345272	0.00355188	0.0022647	0.00232198	0.00302965	0.00280765	0.00276033	0.00408091	0.0046518	0.00405666	0.0035645	0.00267919	0.00616071	0.00413581	0.00409223	0.00378772	0.0033208	0.00402941	0.00507733	0.00532765	0.00556064	0.00519403	0.00526548	0.00525933	0.00528074
158	urea	531.95	6.74764,0	24	77	0.00373292	0.00248941	3.96278e-06	0.00250349	0.00300422	0.00214216	0.00231269	3.03245e-06	0.00312386	2.89908e-06	0.00233902	0.00226115	0.00327665	0.00183444	3.10579e-06	0.00293651	3.00292e-06	0.00177212	2.43299e-06	3.03563e-06	0.000786701	2.99875e-06	0.00289484	0.00130959	0.00224379	0.00276804	0.00191361	0.00185548	0.019732	0.0147314	0.0146122	0.0167381	2.8278e-06	0.00053438	0.0110585
160	oxamic acid	563.033	6.78286,0	30	189	2.60946	1.84772	3.02901	1.93578	2.76855	2.34293	2.42224	1.72756	1.89251	1.35114	2.12529	1.81774	2.24869	1.86049	1.52275	2.33907	2.15248	1.70132	1.43225	2.10581	1.87561	1.09759	1.08393	1.33219	1.45572	1.49041	1.19752	1.27623	2.24122	2.30147	2.33654	2.10327	2.37545	0.782877	2.02347
167	glycerol	883.167	6.88256,0	30	129	0.0234289	0.0287369	0.0268437	0.020861	0.0173902	0.0176649	0.0224876	0.0233488	0.0229378	0.0186105	0.0256463	0.0176639	0.0150824	0.0205483	0.0224038	0.0320137	0.0224201	0.0165639	0.0168265	0.0231185	0.0222244	0.0192006	0.0205835	0.0194289	0.0256507	0.0176435	0.0173486	0.019976	0.0238076	0.0248548	0.0252335	0.0224452	0.0223438	0.022547	0.0235386
170	leucine	748.375	6.89795,0	24	158	0.712698	0.548439	0.912208	0.545439	0.631696	0.456938	0.63457	0.561197	3.59881e-06	2.89908e-06	0.502457	0.486473	0.423375	0.328918	3.10579e-06	0.503636	0.746198	0.570594	0.547254	0.558584	0.487712	2.99875e-06	4.21541e-06	0.581461	0.590391	2.90571e-06	0.571523	0.290564	0.623587	0.649349	0.663915	0.602452	0.600714	0.623977	0.627333
171	phosphate	905.867	6.90344,0	30	299	4.0831e-06	1.38904	1.70832	1.1375	1.44645	1.09845	1.12996	1.2923	1.6002	1.22663	1.55334	1.20183	1.30268	1.36283	1.36614	1.63725	3.00292e-06	1.28152	1.22126	1.32474	1.13848	1.1059	1.74337	1.35935	1.35476	1.1638	1.13488	1.31034	1.12412	1.21395	1.25882	1.16975	1.15208	0.927721	1.14107
174	thymidine 1	713.036	6.94699,0	28	170	0.00649693	0.00666	0.00626548	0.00539375	0.00567087	0.00536329	0.00597506	0.00748835	0.00834524	0.00368475	0.00629972	0.00633472	0.00688838	0.00650686	0.0040854	0.0084067	0.00618342	0.00595668	0.0068505	3.03563e-06	0.00524762	0.00466846	0.0082496	0.00670231	0.00644902	0.00549442	0.00552463	0.00618141	0.0067226	0.00639371	0.00629935	0.00693996	2.8278e-06	2.6297e-06	0.00439351
182	Isoleucine	948.6	7.0545,0	30	158	0.309774	0.300849	0.463397	0.295768	0.239592	0.1535	0.293813	0.337954	0.342604	0.205654	0.358131	0.295047	0.225751	0.29419	0.243655	0.226436	0.594134	0.468554	0.468197	0.283427	0.380734	0.406502	0.538649	0.45899	0.429018	0.293877	0.450467	0.429584	0.348885	0.371437	0.386372	0.348642	0.363767	0.386295	0.367566
181	maleic acid	431.714	7.05722,0	30	341	4.0831e-06	0.00253246	0.00316472	0.00183768	0.00247423	2.8178e-06	0.00166933	0.00189917	0.00207097	0.00197941	0.0018975	0.00177303	0.00168521	0.00188422	0.00209243	0.0024178	0.00241034	0.00215603	0.00221069	0.0018262	0.00218558	0.00227439	0.00210165	0.00176629	0.00184513	0.00182357	0.00166648	0.00191292	0.00116762	0.154932	0.00134263	0.174191	0.225874	0.252123	0.134938
186	proline	954.333	7.115,0	30	142	0.245796	0.204102	0.312755	0.217228	0.158748	0.16431	0.217157	0.176241	0.180556	0.136085	0.222597	0.228242	0.16976	0.18558	0.167893	0.138702	3.00292e-06	0.252315	0.261591	0.188354	0.168143	0.196278	0.268582	0.238752	0.275492	0.165251	0.250199	0.232426	0.18576	0.188137	0.189628	0.170101	0.199519	0.198962	0.188685
187	glycine 2	953.9	7.16331,0	30	174	0.979086	0.701945	0.822439	0.682587	0.733426	0.896568	0.802675	0.635024	0.645304	0.560604	0.561625	0.580408	0.589666	0.595439	0.477643	0.457196	0.732718	0.727276	0.76796	0.723026	0.647636	0.529687	0.707734	0.562166	0.875765	0.717566	0.905093	0.716335	0.689264	0.737548	0.770078	0.78114	0.840081	0.830417	0.774755
193	succinic acid	882.2	7.21631,0	30	247	0.0016165	0.00159787	0.0014905	0.00144517	0.00161483	0.00174909	0.00158566	0.00156641	0.00154	0.00141942	0.00140846	0.00105265	0.00142091	0.00140131	0.00153459	0.00238247	0.00172426	0.00146694	0.00175997	0.00171066	0.00176315	0.00129601	0.00180727	0.00205809	0.00170587	0.00140358	0.00163247	0.00165055	0.00230918	0.0021929	0.00244023	0.00217201	1.62412e-05	0.00224052	0.00189518
195	2,3-Dihydroxypyridine	778.267	7.23547,0	30	240	0.00350497	0.00285194	0.00400403	0.00275734	0.00347237	0.00286802	0.00324311	0.00259391	0.00306777	0.00300003	0.00285853	0.00292025	0.00285898	0.00288325	0.00265054	0.00334411	0.00322462	0.00273218	0.00285051	0.0029666	0.00296143	0.0025967	0.00358638	0.00335287	0.00302775	0.00284837	0.0028648	0.00304615	0.00256194	0.00258726	0.00271538	0.0039064	0.00361562	0.00339064	0.00312954
196	Thymol	237.412	7.2411,0	19	466	4.0831e-06	0.000392386	0.000392303	0.000296656	0.000418274	2.8178e-06	0.000251087	0.000264955	3.59881e-06	2.89908e-06	0.000395048	3.00533e-06	0.000331935	0.000166907	0.000328333	3.71374e-06	0.0003611	0.000401181	2.43299e-06	0.000321914	0.000236446	2.99875e-06	4.21541e-06	3.03321e-06	0.000407583	0.000289199	0.000365211	0.000178707	0.000318763	0.000273097	0.000261551	0.000244174	2.8278e-06	0.000257239	0.000226275
198	4-Acetylbutyric acid 2	235.8	7.25825,0	10	209	4.0831e-06	2.99742e-06	3.96278e-06	0.00205941	0.0027028	0.00214122	0.00115241	3.03245e-06	3.59881e-06	2.89908e-06	2.94078e-06	3.00533e-06	2.70643e-06	3.03048e-06	3.10579e-06	3.71374e-06	3.00292e-06	2.76461e-06	2.43299e-06	0.0026827	0.00044962	2.99875e-06	4.21541e-06	3.03321e-06	2.96843e-06	2.90571e-06	2.8263e-06	3.15797e-06	0.00369063	0.00373175	0.00369597	0.00310214	0.00341667	0.00366079	0.00354966
199	catechol	505.92	7.26824,0	27	254	0.00123286	0.000495889	0.000610971	2.52371e-06	3.37468e-06	0.000694268	0.000506648	0.00057521	3.59881e-06	0.00060382	0.000752788	0.000879033	0.000642791	0.000576207	0.000832126	0.00118816	0.000864161	0.00091972	0.000877206	0.000619079	0.000883408	0.00099941	0.00109915	0.000937316	0.00088747	0.000918756	0.000914033	0.000959356	0.00108977	0.00107129	0.00103511	0.000983594	0.000829602	0.000925771	0.000989189
201	D-Glyceric acid	929.467	7.28481,0	30	102	0.00975224	0.00692724	3.96278e-06	0.00595938	0.00769127	0.00654734	0.00614691	0.00754	3.59881e-06	0.0076112	0.00696748	0.00694064	0.00629924	0.00589369	0.00686383	0.00746373	0.00734404	2.76461e-06	0.0059529	0.00661029	0.00570626	0.00738111	0.00919847	0.00645526	0.00741805	0.00671818	0.00612224	0.00721555	0.00711908	0.00728056	0.007495	0.00642858	0.00678763	0.00740363	0.00708575
210	uracil	695.579	7.40596,0	19	241	0.00189959	0.00183647	3.96278e-06	0.00129128	3.37468e-06	0.00109941	0.00102235	3.03245e-06	3.59881e-06	0.00120004	0.0013907	3.00533e-06	0.00145821	0.00067643	3.10579e-06	3.71374e-06	0.00158173	0.00129845	0.00142286	0.00143181	0.000956946	2.99875e-06	4.21541e-06	3.03321e-06	0.00170861	2.90571e-06	2.8263e-06	0.000287432	0.00387849	0.00417451	0.00412644	0.00247164	0.00224076	0.00189685	0.00313145
213	fumaric acid	457.962	7.41328,0	30	217	0.0330346	0.0184635	0.0166988	0.00784012	0.00859577	0.00659433	0.0152045	0.0217919	0.01913	0.013882	0.00993241	0.00839884	0.00547751	0.0131021	0.0278171	0.0231992	0.0125796	0.0104305	0.00791711	0.00716477	0.0148514	2.99875e-06	0.025765	0.0159136	0.0118078	0.00936512	0.0080012	0.0118093	0.0609351	0.0574568	0.0623642	0.028292	0.0139131	0.00839669	0.0385597
216	Itaconic acid	455.655	7.44147,0	30	221	0.00252924	0.00204325	0.00195159	0.001218	0.00163733	0.00151469	0.00181568	0.00172923	0.00175658	0.00146646	0.00151878	0.00129761	0.00111267	0.00148022	0.00190371	0.00196951	0.00181087	0.00156901	0.00153149	0.00141941	0.00170067	0.00203613	0.00204577	0.00168143	0.00175904	0.00135607	0.00134212	0.00170343	0.00190422	0.00200855	0.00210063	0.00184346	0.0012061	0.00124196	0.00171749
222	serine 1	908.567	7.49547,0	30	204	0.126988	0.118918	0.139053	0.108786	0.114454	0.116953	0.120859	0.104322	0.0942692	0.0703328	0.110352	0.106447	0.0802094	0.094322	0.0921848	0.079975	0.177412	0.116608	0.134964	0.0901494	0.115216	0.128567	0.109942	0.109469	0.155492	0.116272	0.153107	0.128808	0.123884	0.129414	0.133486	0.119633	0.119903	0.124828	0.125191
225	3-Hydroxynorvaline 2	475.733	7.51758,0	30	221	0.0337666	0.03629	0.0295082	0.034262	0.0433448	0.0300226	0.0345324	0.0545097	0.060164	0.0287735	0.048228	0.0401574	0.0394112	0.0452073	0.0321216	0.0566687	0.0348542	0.0285858	0.0244397	0.0453438	0.0370023	0.0446271	0.0749708	0.0443351	2.96843e-06	0.0290911	0.0389969	0.0386707	0.116683	0.129504	0.138127	0.126058	0.148031	0.158477	0.136147
232	Pipecolinic acid	681.724	7.59003,0	29	156	0.00237078	0.00345104	0.00297028	0.00188894	0.00187604	0.0013882	0.00232421	0.00186322	0.00136829	0.00168117	0.00164267	3.00533e-06	0.00166976	0.00137135	0.00126806	3.71374e-06	0.00255564	0.00244616	0.00216472	0.00206561	0.00175065	0.00183683	0.00303059	0.00214909	0.00264072	0.00178425	0.00254107	0.00233042	0.00206809	0.00219579	0.00213421	0.00200761	0.0019945	0.0021058	0.00208433
229	Pelargonic acid	756.724	7.59792,0	30	215	4.0831e-06	2.99742e-06	0.00749232	2.52371e-06	0.00753371	0.00485163	0.00331454	0.00595868	0.00692824	0.00563308	0.00601761	0.00575374	0.00568032	0.00599528	3.10579e-06	3.71374e-06	0.00536443	0.00377928	0.00431415	0.00755583	0.00350342	0.00547631	4.21541e-06	3.03321e-06	0.00630127	0.00491671	0.00513832	0.00363998	0.011109	0.0119585	0.0120002	0.0108262	0.0138248	0.0147836	0.012417
234	Aminooxyacetic acid	469.393	7.62202,0	28	89	0.000735206	0.00077031	0.00082085	0.000928938	0.000993814	0.000668473	0.000819598	0.00149779	0.00133778	0.000612281	0.00104671	0.00118421	0.000951805	0.0011051	0.000700629	0.00127001	0.00097799	0.000809346	0.000523934	0.0011257	0.000901268	0.00116689	0.00162439	0.0011388	2.96843e-06	0.000741443	0.00117484	0.000974889	0.00241519	3.74125e-06	0.00318628	3.37784e-06	0.00384525	0.00378904	0.00220715
236	Tartronic acid	442.6	7.65314,0	30	267	0.00104008	0.00105284	0.000815104	0.000862778	0.000928972	0.000833954	0.000922289	0.00100985	0.000684924	0.000594624	0.000829011	0.000648539	0.000589299	0.000726042	0.000862155	0.00109074	0.000835763	0.000741415	0.000725378	0.000672927	0.000821396	0.00105858	0.00104125	0.000824009	0.000814924	0.000484077	0.000635831	0.00080978	0.00190457	0.001504	0.00165695	0.00150235	0.00134839	0.00137218	0.00154808
238	threonine 1	953.7	7.66944,0	30	219	0.0576639	0.0501325	0.0756889	0.0524217	0.026072	0.0234049	0.047564	0.0542835	0.0305495	0.0413019	0.0486111	0.0369503	0.0249669	0.0394438	0.029192	0.0270133	3.00292e-06	0.0841609	0.0919649	0.0496297	0.0469939	0.0693688	0.0570445	0.0662398	0.0670052	0.0328262	0.0654736	0.0596597	0.0588119	0.061115	0.0640442	0.0547417	0.053335	0.0560693	0.0580195
243	4-Methylcatechol	436.583	7.75836,0	29	305	0.000409182	0.000294632	0.000340155	0.000234056	0.000196029	0.000188099	0.000277025	0.000401855	0.00051542	0.000330953	0.000236662	0.000151918	0.00013578	0.000295431	0.000396678	0.000422719	0.000388541	2.76461e-06	0.000342305	0.000246551	0.000299927	0.000427362	0.00037113	0.000351819	0.000378223	0.000315913	0.00023586	0.000346718	0.000456537	0.000370839	0.000451806	0.000216088	0.00027944	0.000266941	0.000340275
246	DL-Anabasine 1	459.571	7.80236,0	30	239	0.00178211	0.00132725	0.00139485	0.00100092	0.000942797	0.000997396	0.00124089	3.03245e-06	0.00127746	0.000810198	0.00107289	0.000997804	0.000799073	0.000826744	0.00123335	0.00152737	0.00130125	0.00090974	0.000943611	0.0010148	0.00115502	0.00165295	0.00131284	0.00128661	0.00127888	0.000682218	0.000842195	0.00117595	0.00375063	0.00316589	0.0029066	0.00169243	0.00140793	0.00109979	0.00233721
247	thymine	437.731	7.82997,0	26	255	4.0831e-06	0.00169618	0.00122271	0.00120025	0.00101591	0.00126581	0.00106749	0.00160126	3.59881e-06	0.000549153	0.00107355	0.00108336	0.00150485	0.000969294	3.10579e-06	0.0018563	0.00106143	0.001002	0.00111829	3.03563e-06	0.000840695	0.00124583	0.00141288	0.00159698	0.00119601	0.000765479	0.000822838	0.00117334	0.00187293	0.00203732	3.72051e-06	0.00155404	0.00155787	0.00169854	0.00145407
257	3-Methylglutaric Acid	329.333	7.96507,0	25	143	0.000278089	0.000381343	3.96278e-06	0.00026038	0.000369106	0.000224937	0.00025297	3.03245e-06	0.000328808	0.000172966	0.00045113	0.000472207	0.000321239	0.000291564	0.000430871	0.000554581	0.000578489	0.000345018	0.000395071	0.000413616	0.000452941	2.99875e-06	4.21541e-06	0.000379503	0.000370853	0.000208208	0.000380566	0.000224391	0.000347433	0.000473996	0.000553148	0.000792544	0.000678463	2.6297e-06	0.000474702
258	2-Deoxytetronic acid	753.367	7.97056,0	30	73	0.0202283	0.015527	0.0160399	0.0114451	0.0107351	0.0127312	0.0144511	0.01779	0.0129704	0.0098225	0.013918	0.0121535	0.00999278	0.0127745	0.0112842	0.0119331	0.0168953	0.0158943	0.0150014	0.0135508	0.0140932	0.0138768	0.0167053	0.0130766	0.0153557	0.0127117	0.0128951	0.0141035	0.018116	0.0192323	0.0213307	0.0162403	0.0174505	0.0190061	0.0185627
259	beta-Alanine 2	562.069	7.98727,0	29	174	0.00148427	0.000381683	0.000761812	0.000472832	0.000446486	0.000628512	0.000695932	0.000748716	0.000628382	0.000678459	0.000496001	0.000655714	0.000671615	0.000646481	0.000351163	0.000688229	0.000647737	0.000601537	2.43299e-06	0.000944874	0.000539329	0.000320917	0.000912455	0.000269796	0.00112107	0.000269252	2.8263e-06	0.00048272	0.000622275	0.000605804	0.000643475	3.37784e-06	0.00103086	0.00101602	0.000653636
264	6-hydroxy caproic acid	311.833	8.0408,0	27	327	0.000505319	0.000440314	0.000405456	0.000305321	0.000381752	0.000329575	0.000394623	0.000249107	0.000292239	0.000276291	0.000298329	0.000268086	0.00027922	0.000277212	0.000302265	0.000343972	0.000370768	0.000345724	0.000348006	0.000320472	0.000338535	0.000424113	0.000434436	0.000219398	0.000307365	0.000273353	0.000265992	0.000320776	0.000297542	0.000169819	3.72051e-06	3.37784e-06	0.00029411	2.6297e-06	0.000128533
272	Erythrose 1	532.667	8.13436,0	30	350	0.0664996	0.068307	0.0619528	0.0703317	0.0861029	0.0689882	0.0703637	0.108227	0.102767	0.0471863	0.0930938	0.084994	0.0781798	0.0857412	3.10579e-06	0.0957676	0.0811628	0.0660214	0.0560185	0.0952062	0.0656966	0.0700251	0.103669	0.0707167	2.96843e-06	0.0507721	0.0757436	0.0618216	0.113426	0.119659	0.125815	0.128198	0.153483	0.172189	0.135462
276	3-Aminoisobutyric acid 1	552.067	8.20569,0	30	154	0.0146629	0.0134535	0.0150911	0.0122707	0.0153913	0.01355	0.0140699	0.0129224	0.0132669	0.0103388	0.0132118	0.0123522	0.010676	0.012128	0.0111107	0.0133996	0.0141201	0.0121699	0.0120411	0.013603	0.0127407	0.0138077	0.0148848	0.0124954	0.014536	0.0108047	0.0114911	0.0130033	0.0152295	0.0151387	0.0157375	0.0142329	0.0141221	0.0151539	0.0149358
279	oxalacetic acid	382.25	8.22328,0	30	281	0.00216959	0.105329	0.00103576	0.0902475	0.0812877	0.112347	0.0654028	0.0930113	0.00935021	0.000835429	0.0860097	0.00770156	0.00327288	0.0333635	0.0128082	0.0483944	0.0707435	0.0724111	0.0849264	0.0698943	0.059863	0.0648719	0.00442937	0.00702088	0.0872904	0.000963715	0.000959346	0.0275893	0.045335	0.045021	0.0467349	0.0448248	0.0656336	0.0775013	0.0541751
281	Aminomalonic acid	893.767	8.24228,0	30	218	0.0172058	2.99742e-06	0.0158784	0.0176447	0.0183451	0.0201408	0.0148696	0.0266754	0.0454458	0.010136	0.0153628	0.0141163	0.0163194	0.0213426	0.0189404	3.71374e-06	0.0307612	0.0290441	0.019446	0.0213614	0.0199261	0.014642	0.0201913	0.0163054	0.034023	0.0160767	0.0257879	0.021171	0.0356564	0.0369041	0.0389435	0.0385967	0.0366867	0.0399497	0.0377895
290	L-Malic acid	905.167	8.33783,0	30	233	0.00179691	0.00255793	3.96278e-06	0.00155612	0.00198688	0.00183497	0.00162279	0.00212131	0.0025339	0.00176756	0.00223305	0.00191923	0.0016969	0.00204532	3.10579e-06	0.00233541	0.00193972	0.0015589	0.00193855	0.00145561	0.00153855	0.00166036	0.0026664	0.00185323	0.00211294	0.00168775	0.00192379	0.00198408	0.00372083	0.00320789	0.0031953	0.0023399	0.00235573	0.002308	0.00285461
296	Threitol	858.867	8.38633,0	30	103	4.0831e-06	0.00248263	0.00241071	0.00190706	0.00208343	0.00207577	0.00182728	0.0024817	0.00232086	0.00169826	0.00213605	0.00190968	0.00167539	0.00203699	0.00188026	0.002615	0.00231948	0.00181826	0.00187193	0.00197295	0.00207965	0.00205491	0.00219269	0.00192537	0.00209957	0.00149532	0.00159399	0.00189364	0.00284098	0.0026837	0.00261591	0.00185149	0.00176283	0.00168667	0.00224026
299	5,6-dihydrouracil 1	269.607	8.41716,0	29	245	0.000637261	0.000407938	0.000383426	0.00027449	0.000337299	2.8178e-06	0.000340538	0.000378911	0.000368569	0.00029964	0.000274567	0.000221978	0.000213134	0.0002928	0.000533623	0.000605778	0.000301775	0.000266489	0.000258155	0.000286477	0.000375383	2.99875e-06	0.000333686	0.00043563	0.000439468	0.000170887	0.000153421	0.000256015	0.000416846	0.000499907	0.000447982	0.000338718	0.00013082	2.6297e-06	0.000306151
301	Threitol	903.367	8.43919,0	30	217	4.0831e-06	0.00681404	0.00681801	0.00491779	0.00570412	0.00535663	0.00493578	0.00758082	0.00728564	0.00457655	0.00505155	0.00626366	0.00445727	0.00586925	0.00766284	0.00802906	0.0057514	0.00563916	0.00512794	0.00564506	0.00630925	2.99875e-06	0.00688749	0.00614052	0.00666131	0.00465393	0.0045607	0.00481782	0.0113114	0.0113144	0.0114358	0.00669605	0.00559776	0.00542616	0.00863026
308	4-hydroxybenzaldehyde 1	212.571	8.50681,0	30	337	0.00283597	0.00216996	0.00324597	0.00209972	0.00344865	0.00254795	0.0027247	0.00214059	0.00235212	0.00161643	0.00228321	0.00200091	0.00219893	0.0020987	0.00178259	0.00233467	0.00201531	0.00160008	0.00139229	0.00233401	0.00190982	0.0014732	0.00163575	0.00161102	0.00153542	0.00163699	0.00160736	0.00158329	0.00184569	0.00153438	0.00206197	0.00180511	0.0020357	0.00213906	0.00190365
309	3-Hexenedioic acid	377.071	8.53639,0	30	185	0.0195172	0.00834409	0.00833787	0.00514242	0.00435766	0.00283585	0.00808917	0.0120999	0.00944731	0.0069735	0.00394273	0.00459057	0.00546712	0.00708686	3.10579e-06	0.0133536	0.00523355	0.00382021	0.00427761	0.00351893	0.00503449	2.99875e-06	0.0118001	0.0102213	0.00460423	0.00423885	0.00423614	0.00585061	0.0150186	0.021407	0.0301794	0.00914666	0.00422594	0.00236857	0.0137243
312	aspartic acid 1	823.333	8.55208,0	30	232	0.00829768	0.00903314	0.010202	0.00810156	0.00776986	0.0126418	0.00934101	0.00468448	0.00406852	0.00607879	0.00798096	0.00718429	0.00356456	0.0055936	0.00499542	0.00411471	0.010859	0.00870928	0.00970245	0.00624744	0.00743804	0.00995114	0.006935	0.00795131	0.00643697	0.00437308	0.00774906	0.00723276	0.00607338	0.00592	0.00641919	0.0060505	0.00792787	0.00862132	0.00683538
315	methionine 1	794.333	8.58781,0	30	176	0.0216799	0.0193121	0.0239423	0.0173538	0.0104293	0.0127032	0.0175701	0.0171319	0.0129789	0.00860363	0.0207259	0.0138669	0.00948143	0.0137981	0.0108995	0.00970284	3.00292e-06	0.0278441	2.43299e-06	0.0157214	0.0106955	0.0192556	0.0175897	0.0193247	0.0239474	0.0101168	0.0234591	0.0189489	0.0130109	0.0136414	0.0142373	0.0146624	0.0176322	0.0185831	0.0152945
316	trans-4-hydroxy-L-proline 2	835.778	8.60015,0	27	332	0.00313577	0.00229593	0.00283826	0.00183282	0.00214776	0.00205961	0.00238502	0.00238311	0.00223399	0.00152248	0.00187596	0.00195066	0.00175484	0.00195351	0.00202344	0.00190691	0.00249218	0.00258307	0.0023441	0.00212275	0.00224541	0.00215141	0.00265629	0.00241785	0.00285149	0.00158812	0.00230833	0.00232892	4.10271e-06	0.00204132	0.0021475	0.00171519	2.8278e-06	2.6297e-06	0.000985595
318	oxoproline	940.4	8.62308,0	30	156	2.81442	2.01074	2.57797	1.80903	1.94625	2.23754	2.23266	1.55859	1.22006	1.20001	1.6548	1.80734	1.42294	1.47729	1.62655	1.33032	1.76607	1.74966	1.57832	1.7081	1.6265	1.71335	1.89724	1.70523	2.29841	1.32205	1.82386	1.79336	1.75254	1.8426	1.82347	1.65635	1.84684	1.85988	1.79695
333	Threonic acid	624	8.67025,0	27	292	0.007791	0.00431844	0.00503197	0.00400789	0.00478487	0.00481904	0.00512554	0.00454867	0.00444863	0.00318814	0.00367974	0.00443273	0.0036557	0.00399227	0.00390285	0.00501203	0.0046151	0.00465134	0.00398247	0.00425721	0.0044035	0.0044569	0.00483546	0.00401204	0.00576888	0.00357826	0.00387575	0.00442122	4.10271e-06	0.00573829	2.14503e-05	0.00510613	2.8278e-06	2.6297e-06	0.00181257
330	4-aminophenol 1	437.962	8.71533,0	30	217	0.00724245	0.00409116	0.00370874	0.00196029	0.00190237	0.0015482	0.00340887	0.00459791	0.00380873	0.0031039	0.00214438	0.00204197	0.00133713	0.002839	0.00585711	0.00504836	0.00275797	0.00241992	0.00196589	0.00150953	0.0032598	2.99875e-06	0.00553207	0.0037322	0.00266484	0.00211638	0.00185882	0.00265122	0.011468	0.0129884	0.0140031	0.0072657	0.00385256	0.00260637	0.00869734
337	creatine	969.1	8.81331,0	30	115	0.580821	0.638656	0.381974	0.398733	0.575228	0.548355	0.520628	0.425697	0.587925	0.309372	0.591556	0.505408	0.40584	0.470966	0.476719	0.592796	3.00292e-06	0.705558	2.43299e-06	0.525883	0.383494	0.55432	0.735859	0.556104	0.765515	0.580672	0.521938	0.619068	0.625071	0.65547	0.668895	0.624968	0.570009	0.576733	0.620191
343	alpha-ketoglutaric acid	801.727	8.90826,0	11	198	0.00276384	2.99742e-06	0.00290671	0.0023503	3.37468e-06	0.00402962	0.00200947	0.00351412	3.59881e-06	2.89908e-06	2.94078e-06	3.00533e-06	2.70643e-06	0.000588211	3.10579e-06	3.71374e-06	3.00292e-06	2.76461e-06	2.43299e-06	3.03563e-06	3.00928e-06	2.99875e-06	4.21541e-06	3.03321e-06	2.96843e-06	2.90571e-06	2.8263e-06	3.15797e-06	0.00371333	0.00426721	0.00405665	0.00385598	0.00378172	0.00393791	0.00393547
358	3-hydroxy-3-methylglutaric acid	448	9.05837,0	24	274	4.0831e-06	0.000919983	3.96278e-06	0.000270884	0.000239923	0.000160843	0.000266613	0.000973879	3.59881e-06	2.89908e-06	0.000279332	0.000233711	0.000267573	0.000293499	0.000599905	3.71374e-06	0.000947886	0.000882942	0.000212722	0.000366169	0.000502223	2.99875e-06	4.21541e-06	0.000206293	0.000290767	0.000195186	0.000262389	0.000160308	0.000887738	0.000899626	0.000980149	0.00117708	0.000597137	0.000838454	0.000896697
359	Digitoxose 2	541.367	9.06506,0	30	204	4.0831e-06	0.0393309	0.0521254	0.0293754	0.0320745	0.0259652	0.0298126	0.0519638	0.0466214	0.0365119	0.0278595	0.0302465	0.0212163	0.0357365	0.0555114	0.049888	0.0364964	0.0279197	0.0244693	0.0274791	0.0369607	2.99875e-06	0.0559969	0.0506361	0.0348785	0.0247513	0.0297909	0.0326761	0.0678384	0.0755707	0.0890117	0.05729	0.0380515	0.0302355	0.0596663
363	D-erythronolactone 2	585.393	9.10833,0	30	204	4.0831e-06	0.0128497	0.0161674	0.00957654	0.0100041	0.00815392	0.00945929	0.0180659	0.0150667	0.0118651	0.00866879	0.00981733	0.00667378	0.0116929	0.0198178	0.0162413	0.0116042	0.00889537	0.00725851	0.00868237	0.0120833	2.99875e-06	0.0189134	0.0176831	0.0115862	0.00783462	0.00986492	0.0109809	0.0254999	0.029127	0.034132	0.0195515	0.0131471	0.010487	0.0219907
367	glutamic acid	798.48	9.15767,0	25	246	4.0831e-06	0.0152256	0.0147871	2.52371e-06	0.0162241	2.8178e-06	0.0077077	0.0127038	3.59881e-06	2.89908e-06	0.0139481	0.013943	0.0120453	0.00877443	0.0103445	0.0115454	0.0135906	0.0126225	0.0141868	0.0136478	0.0126563	0.0125314	0.0115532	0.0129157	0.0157043	0.00970777	0.0134754	0.012648	0.00885836	0.00940519	3.72051e-06	0.00991578	2.8278e-06	0.0144495	0.0071059
369	3-hydroxyphenylacetic acid	287.905	9.17367,0	22	281	4.0831e-06	0.000656409	3.96278e-06	0.000725277	3.37468e-06	0.000760986	0.000359015	3.03245e-06	0.00143555	2.89908e-06	0.000941741	0.000966675	2.70643e-06	0.000558768	0.000644693	0.000911622	0.000724585	0.000651657	2.43299e-06	0.0010446	0.000663265	2.99875e-06	0.00153593	0.00120572	0.00146607	0.000691818	0.000960832	0.000977228	0.00147093	0.00147563	0.00148944	0.00143043	0.0014903	0.00158857	0.00149088
372	tartaric acid	460.792	9.22724,0	26	355	0.000571886	0.0427929	0.000303985	0.0434926	0.0338575	0.0517866	0.0288009	0.0436558	0.00408447	0.00049976	0.0395623	0.00279636	0.00109743	0.0152827	0.00591291	0.0240107	0.0329079	2.76461e-06	0.035898	0.0324725	0.0218675	2.99875e-06	4.21541e-06	0.00284275	0.0389214	2.90571e-06	0.000325881	0.00701669	0.0184662	0.0183277	0.01847	0.0166737	0.0219801	0.0231802	0.0195163
376	phenylalanine 1	891.033	9.26275,0	30	218	0.0721006	0.081897	0.0985571	0.0700134	0.0768482	0.0617549	0.0768619	0.0867066	0.071493	0.0460907	0.0889032	0.0827613	0.0677071	0.0739437	0.0493879	0.0931391	0.096836	0.0797243	0.090309	0.0939803	0.0838961	0.0803477	0.066603	0.0657453	0.10956	0.0529212	0.0943165	0.0782489	0.0617444	0.067617	0.0518345	0.0643155	0.077518	0.0931767	0.0693677
382	allose 1	535.333	9.32261,0	15	201	0.00163315	0.00206261	0.00194221	2.52371e-06	0.00103572	2.8178e-06	0.00111317	0.00199164	0.00185666	2.89908e-06	0.00108237	0.00117221	2.70643e-06	0.00101808	0.00258016	3.71374e-06	3.00292e-06	2.76461e-06	2.43299e-06	3.03563e-06	0.000432518	2.99875e-06	4.21541e-06	0.00104149	2.96843e-06	2.90571e-06	2.8263e-06	0.000176234	0.00270817	0.00277522	0.00302457	3.37784e-06	0.00162112	0.00152014	0.0019421
388	pyrophosphate 3	545.308	9.39889,0	27	451	0.00042412	0.00053688	0.000902461	0.000651426	0.00104335	2.8178e-06	0.000593509	0.000470982	0.000674499	0.000506563	0.00104873	0.000978728	0.000938788	0.000769715	0.000305304	0.000877099	3.00292e-06	0.000663845	0.00109398	0.00117643	0.000686611	0.000198603	0.000407042	0.000618339	0.00116835	0.000869894	0.000647358	0.000651598	4.10271e-06	0.000137242	0.000282712	0.000448571	0.000635394	0.000522559	0.00033843
394	ribose	737.533	9.46064,0	30	217	0.0556902	0.0306163	0.0349445	0.0229958	0.0227204	0.0211243	0.0313486	0.038103	0.0347389	0.0319317	0.0209304	0.0222365	0.0165888	0.0274216	0.0406458	0.0393534	0.0269934	0.0206602	0.0187321	0.0212349	0.0279366	2.99875e-06	0.0438127	0.0376408	0.025578	0.0208844	0.0216778	0.0249328	0.0485193	0.0533826	0.0634046	0.0368239	0.0247814	0.0204002	0.0412187
395	asparagine 1	486.909	9.48109,0	16	320	4.0831e-06	0.000443195	3.96278e-06	2.52371e-06	3.37468e-06	2.8178e-06	7.66594e-05	3.03245e-06	0.000550229	2.89908e-06	0.00015812	3.00533e-06	2.70643e-06	0.000119999	0.000172666	0.000963225	0.000369665	0.000385539	0.000146212	3.03563e-06	0.000340057	2.99875e-06	4.21541e-06	3.03321e-06	0.000132192	2.90571e-06	0.000103533	4.14797e-05	0.000318914	0.000379541	0.000354447	0.000389717	0.000116502	0.00022511	0.000297372
404	xylitol	340	9.6046,0	25	333	0.001162	0.000925299	0.00124417	0.000702062	0.000891111	0.000794789	0.000953239	0.000940273	0.00104946	0.000796669	2.94078e-06	3.00533e-06	0.000704278	0.000582771	0.000783891	0.00105307	0.000854817	0.000775086	2.43299e-06	0.000918198	0.00073125	0.00084138	0.00123072	0.000965363	0.000869334	2.90571e-06	0.00067518	0.000764148	4.10271e-06	3.74125e-06	0.00116975	0.000702676	2.8278e-06	0.000722932	0.000434338
405	3,6-Anhydro-D-galactose 1	470.481	9.60889,0	27	306	0.00188381	0.00114481	0.00148726	0.00084725	0.000827446	0.000855753	0.00117439	0.00127485	0.00115617	0.00103742	0.000820974	3.00533e-06	0.000819116	0.000851924	0.00142849	0.00135889	3.00292e-06	0.000833293	0.000919979	0.0010752	0.000936475	2.99875e-06	0.0013617	0.00129686	0.000819857	0.000727669	0.000958169	0.000861209	0.00120329	0.00140603	0.00198084	0.000986838	0.000850638	2.6297e-06	0.00107171
407	xylitol	897.345	9.63296,0	29	217	0.0138427	2.99742e-06	0.0120759	0.00727848	0.00935729	0.0111331	0.00894841	0.0136556	0.0112827	0.00825578	0.00887179	0.00830208	0.00792556	0.00971558	0.0125912	0.0131266	0.0123338	0.00925138	0.0117424	0.00993323	0.0114964	0.0125547	0.0142022	0.00993099	0.0161319	0.00801244	0.00982639	0.0117764	0.0128985	0.0126564	0.0134039	0.0108748	0.0104552	0.0101391	0.011738
410	3-(2-Hydroxyphenyl)propionic acid	317.63	9.66522,0	30	282	0.0113325	0.011244	0.0114509	0.0123201	0.0162049	0.0119869	0.0124232	0.0190845	0.0222101	0.0100875	0.0162165	0.0159433	0.0160937	0.016606	0.00988549	0.0191718	0.0125738	0.0105145	0.0084146	0.0178972	0.0130762	0.0133178	0.0261746	0.0167118	0.0244902	0.0117792	0.0155681	0.0180069	0.0281561	0.0269466	0.0274246	0.0259203	0.0299061	0.0308958	0.0282082
415	2,5-dihydroxybenzaldehyde	302.88	9.69744,0	28	305	0.0099102	0.00570539	0.00703578	0.00406655	0.00529072	0.00443196	0.00607343	0.00694402	0.00704693	2.89908e-06	0.00418124	0.00431153	0.00337444	0.00431018	0.0069774	0.00666668	0.00513784	0.00418164	0.00376104	0.00424869	0.00516221	2.99875e-06	0.00757452	0.00666236	0.00532773	0.00367514	0.00443387	0.00461277	0.0088109	0.00928349	0.0103963	0.00686876	0.00563706	2.6297e-06	0.00683319
417	xylitol	947.733	9.71172,0	30	103	0.0601107	0.0361412	0.0420748	0.0212752	0.0267703	0.023826	0.035033	0.0402137	0.0431223	0.0287073	0.0256708	0.0232485	0.0195311	0.0300823	0.0398839	0.0391566	0.0307715	0.0259553	0.023947	0.0246529	0.0307279	0.0424108	0.0494941	0.0342128	0.0318749	0.0232482	0.024287	0.0342546	0.0342338	0.0326564	0.0330561	0.0231973	0.016611	0.0136678	0.0255704
420	D-Arabitol	533.567	9.74333,0	30	305	4.0831e-06	0.0640302	0.0832045	0.0474835	0.0515707	0.0418627	0.0480259	0.0852099	0.0783168	0.0601844	0.0448857	0.0483217	0.0349787	0.0586495	0.090969	0.0795109	0.0579964	0.0447015	0.0395641	0.0441566	0.0594831	2.99875e-06	0.0935518	0.0831807	0.056921	0.0401807	0.0487552	0.0537654	0.12146	0.137758	0.1646	0.0966059	0.0693813	0.0545121	0.107386
422	fucose 1	652.08	9.76357,0	25	204	0.00260133	0.00239988	0.00441564	0.00264179	0.00345346	0.00287213	0.00306404	0.00262797	0.00420607	2.89908e-06	0.00282675	3.00533e-06	0.00236644	0.00200552	0.00234636	0.00249484	0.00336475	0.00281326	0.00280154	0.00298851	0.00280155	0.00239504	0.00442742	0.00372297	0.00254906	0.00240143	0.0027699	0.0030443	4.10271e-06	3.74125e-06	3.72051e-06	0.00303199	0.00236663	0.00202204	0.0012387
424	Acetol 5	405.56	9.80114,0	30	185	0.00350293	0.00223251	0.00194966	0.000776721	0.00129929	0.00107254	0.00180561	0.00345979	0.00172503	0.00154981	0.00233765	0.00192712	0.00153415	0.00208892	0.00125515	0.00195107	0.00433967	0.00363283	0.00400285	0.00271645	0.002983	2.99875e-06	0.0064566	0.00484379	0.0030344	0.00129685	0.00482336	0.00340967	0.00356063	0.00339017	0.00345994	0.00339702	0.00332554	0.00307277	0.00336768
433	6-deoxy-D-glucose 2	498.7	9.86942,0	30	205	0.00891655	0.00782411	0.00930187	0.00724928	3.37468e-06	0.00845441	0.00695827	0.00773935	0.00893356	0.0060484	0.00799265	0.00759232	0.00705731	0.0075606	0.00717003	0.00820787	0.00820618	0.00777051	0.00760441	0.00857146	0.00792175	0.00734079	0.0088433	0.0076416	0.00932668	0.00664473	0.00767183	0.00791149	0.0118237	0.0124609	0.0127676	0.0116182	0.00997046	0.0106355	0.0115461
434	Lyxonic acid, 1,4-lactone	508.077	9.88089,0	30	191	0.00347768	0.00239069	0.00329679	0.0020957	0.00263843	0.00248242	0.00273028	0.00304262	0.00316151	0.00219407	0.00225583	0.0023211	0.00195289	0.002488	0.00265783	0.00304372	0.00261144	0.00231723	0.00214918	0.0024868	0.00254437	0.00297041	0.00336763	0.00295917	0.00276861	0.00203289	0.00242176	0.00275341	0.00401977	0.00387795	0.00423727	0.00330242	0.00248179	0.00278593	0.00345085
436	2-Amino-1-phenylethanol	250.464	9.90778,0	30	248	4.0831e-06	0.00262061	3.96278e-06	0.0026965	0.00357938	0.0028504	0.00195916	0.00317517	0.00401609	0.00242881	0.00342033	0.00343351	0.00330222	0.00329602	0.00259354	0.00359453	0.00357941	0.00317562	0.00245893	0.00364175	0.00317396	0.00306145	0.00533859	0.00367695	2.96843e-06	0.00325702	0.00396816	0.00321752	0.00374454	0.00374776	0.00377299	0.00388831	0.00306109	0.00326739	0.00358035
438	Diglycerol 1	482.933	9.92786,0	30	217	0.10274	0.0446921	0.0485778	0.032196	0.0227005	0.0161177	0.0445041	0.062625	0.0433274	0.0407935	0.0212008	0.0276319	0.0210551	0.0361056	3.10579e-06	0.0608675	0.03228	0.02374	0.0239127	0.0179833	0.0264644	2.99875e-06	0.066764	0.0609546	0.0283663	0.0221815	0.0244214	0.0337818	0.0958137	0.12717	0.173491	0.0623949	0.0281832	0.0171221	0.0840292
441	D-(glycerol 1-phosphate)	706	9.95339,0	29	299	0.00409623	0.00468029	0.00414346	0.00380869	0.00345852	0.0030787	0.00387765	0.0041736	0.00483371	0.00334448	0.00460099	0.00341758	0.00309274	0.00391052	0.00354834	0.00459997	3.00292e-06	0.00490366	2.43299e-06	0.0042857	0.00289052	0.00406367	0.00474732	0.00483242	0.00446429	0.00372479	0.00359547	0.00423799	0.00299636	0.00316034	0.0035659	0.00286491	0.00286098	2.6297e-06	0.00257519
442	citrulline 2	288.235	9.98464,0	28	264	4.0831e-06	0.00447319	3.96278e-06	0.00467492	0.00450255	0.00471903	0.00306296	3.03245e-06	0.00399647	0.00465404	0.0047293	0.00429177	0.00502458	0.0037832	0.0041823	0.00464669	0.00444158	0.00475436	2.43299e-06	0.00450361	0.00375516	0.00403635	4.21541e-06	0.00377149	0.00496691	0.0043524	0.00432485	0.00357604	0.0061829	0.00650129	0.00672571	0.00666756	0.00604553	0.00677451	0.00648291
445	Glucose-1-phosphate	794.733	9.99053,0	30	217	0.0566362	0.0379493	0.0434009	0.0336654	0.0451447	0.0465314	0.043888	0.0418043	0.0515113	0.0300486	0.0336843	0.0348407	0.0319245	0.0373023	0.0431462	0.0425266	0.0384483	0.0364482	0.0366721	0.0474795	0.0407868	0.0477274	0.0517621	0.0494623	0.0420465	0.0355021	0.0423918	0.0448154	0.0593734	0.0625702	0.0672489	0.0497653	0.0459588	0.0479315	0.0554747

## Sheet: C80 VS C60
ID	Peak	Similarity	RT	Count	Mass	MEAN C60	MEAN C80	VIP	P-VALUE	FOLD CHANGE C80 VS C60
520	canavanine 1	247.429	11.1481	21	188	0.000855113	0.000184823	2.11124	0.0190735	0.216139
657	maltose	675.4	14.569	10	361	3.03048e-06	0.00208469	1.77982	0.0284974	687.906
664	prunin degr. Prod. 1	535.75	14.9909	28	73	0.0113112	0.00506935	2.0557	0.00724956	0.448172
160	oxamic acid	563.033	6.78286	30	189	1.86049	2.42224	1.7648	0.0351608	1.30194
170	leucine	748.375	6.89795	24	158	0.328918	0.63457	1.80982	0.0338548	1.92926
187	glycine 2	953.9	7.16331	30	174	0.595439	0.802675	2.28974	0.00642044	1.34804
222	serine 1	908.567	7.49547	30	204	0.094322	0.120859	2.10127	0.00704372	1.28134
232	Pipecolinic acid	681.724	7.59003	29	156	0.00137135	0.00232421	1.52884	0.0472972	1.69483
236	Tartronic acid	442.6	7.65314	30	267	0.000726042	0.000922289	1.73644	0.0328233	1.2703
264	6-hydroxy caproic acid	311.833	8.0408	27	327	0.000277212	0.000394623	2.14456	0.0100976	1.42354
276	3-Aminoisobutyric acid 1	552.067	8.20569	30	154	0.012128	0.0140699	1.80619	0.0222188	1.16012
308	4-hydroxybenzaldehyde 1	212.571	8.50681	30	337	0.0020987	0.0027247	1.70297	0.0317681	1.29828
312	aspartic acid 1	823.333	8.55208	30	232	0.0055936	0.00934101	2.35704	0.00487109	1.66994
318	oxoproline	940.4	8.62308	30	156	1.47729	2.23266	2.33981	0.00245553	1.51132
410	3-(2-Hydroxyphenyl)propionic acid	317.63	9.66522	30	282	0.016606	0.0124232	1.81927	0.043996	0.748119

## Sheet: C80 VS C40
ID	Peak	Similarity	RT	Count	Mass	MEAN C40	MEAN C80	VIP	P-VALUE	FOLD CHANGE C80 VS C40
452	Farnesal 2	293.154	10.0666	25	230	0.0176575	0.00791065	2.12547	0.0402246	0.448005
635	arbutin	722.643	13.6497	16	361	3.00928e-06	0.00197535	1.96084	0.0438445	656.418
657	maltose	675.4	14.569	10	361	3.00928e-06	0.00208469	2.14924	0.0284964	692.752
78	2-hydroxybutanoic acid	933.467	5.82386	30	131	0.0347865	0.0239399	2.26021	0.010991	0.688197
160	oxamic acid	563.033	6.78286	30	189	1.87561	2.42224	1.84045	0.0492929	1.29144
257	3-Methylglutaric Acid	329.333	7.96507	25	143	0.000452941	0.00025297	2.24862	0.0141942	0.558504
308	4-hydroxybenzaldehyde 1	212.571	8.50681	30	337	0.00190982	0.0027247	2.16128	0.014538	1.42668
318	oxoproline	940.4	8.62308	30	156	1.6265	2.23266	2.44331	0.00572637	1.37267
343	alpha-ketoglutaric acid	801.727	8.90826	11	198	3.00928e-06	0.00200947	2.24821	0.0308825	667.758

## Sheet: C80 VS C20
ID	Peak	Similarity	RT	Count	Mass	MEAN C20	MEAN C80	VIP	P-VALUE	FOLD CHANGE C80 VS C20
465	citric acid	914.5	10.2683	30	273	0.121986	0.0593582	1.83888	0.022593	0.486596
625	salicin	476.615	13.4388	26	446	0.000260856	0.00061344	1.78612	0.0193443	2.35164
635	arbutin	722.643	13.6497	16	361	3.15797e-06	0.00197535	1.65793	0.0438551	625.512
657	maltose	675.4	14.569	10	361	3.15797e-06	0.00208469	1.81501	0.0285035	660.135
73	hydroxylamine	927.733	5.77797	30	133	0.0547424	0.0697032	1.73983	0.0413971	1.27329
108	N-Methyl-DL-alanine	847.767	6.176	30	130	0.0648829	0.0431401	1.66524	0.0480573	0.664892
116	alpha-ketoisocaproic acid 2	647.759	6.23227	29	89	0.00957561	0.00708402	1.7785	0.0288159	0.739798
131	malonic acid 1	600.828	6.39066	29	174	0.00205775	0.00126893	2.22514	0.00124955	0.616656
160	oxamic acid	563.033	6.78286	30	189	1.27623	2.42224	2.3675	0.000224938	1.89797
170	leucine	748.375	6.89795	24	158	0.290564	0.63457	1.572	0.0398801	2.18392
182	Isoleucine	948.6	7.0545	30	158	0.429584	0.293813	1.84963	0.0279736	0.683949
308	4-hydroxybenzaldehyde 1	212.571	8.50681	30	337	0.00158329	0.0027247	2.29268	0.00378085	1.72091
343	alpha-ketoglutaric acid	801.727	8.90826	11	198	3.15797e-06	0.00200947	1.8267	0.0308904	636.318
382	allose 1	535.333	9.32261	15	201	0.000176234	0.00111317	1.49859	0.048673	6.31642

## Sheet: C60 VS C40
ID	Peak	Similarity	RT	Count	Mass	MEAN C40	MEAN C60	VIP	P-VALUE	FOLD CHANGE C60 VS C40
565	Indolelactate 2	815.967	12.0998	30	202	0.00121892	0.00225292	1.79666	0.049958	1.84829
635	arbutin	722.643	13.6497	16	361	3.00928e-06	0.00131718	2.17406	0.0454313	437.705
181	maleic acid	431.714	7.05722	30	341	0.00218558	0.00188422	2.33125	0.0178373	0.862112
193	succinic acid	882.2	7.21631	30	247	0.00176315	0.00140131	1.92083	0.0389755	0.794776
264	6-hydroxy caproic acid	311.833	8.0408	27	327	0.000338535	0.000277212	2.78946	0.000490049	0.818859

## Sheet: C60 VS C20
ID	Peak	Similarity	RT	Count	Mass	MEAN C20	MEAN C60	VIP	P-VALUE	FOLD CHANGE C60 VS C20
446	Biuret 2	408.033	10.0188	30	243	0.00785558	0.00534653	1.51807	0.0455809	0.680603
635	arbutin	722.643	13.6497	16	361	3.15797e-06	0.00131718	2.02963	0.0454477	417.096
76	glycine 1	884.5	5.80544	30	102	0.139952	0.0455743	2.4408	0.00171627	0.325642
131	malonic acid 1	600.828	6.39066	29	174	0.00205775	0.00125072	2.32442	0.000407349	0.607808
138	valine	956.067	6.49683	30	144	0.971656	0.762928	1.93419	0.0176223	0.785184
152	4-hydroxybutyrate	555	6.639	30	205	0.00402941	0.00232198	1.83051	0.0370562	0.576258
160	oxamic acid	563.033	6.78286	30	189	1.27623	1.86049	2.23757	0.00273994	1.4578
182	Isoleucine	948.6	7.0545	30	158	0.429584	0.29419	1.9922	0.00916375	0.684826
199	catechol	505.92	7.26824	27	254	0.000959356	0.000576207	2.13472	0.0254756	0.600619
222	serine 1	908.567	7.49547	30	204	0.128808	0.094322	1.96002	0.00937334	0.732267
232	Pipecolinic acid	681.724	7.59003	29	156	0.00233042	0.00137135	1.74076	0.0195564	0.588456
238	threonine 1	953.7	7.66944	30	219	0.0596597	0.0394438	1.97742	0.0185349	0.661147
308	4-hydroxybenzaldehyde 1	212.571	8.50681	30	337	0.00158329	0.0020987	2.43802	0.004308	1.32553
337	creatine	969.1	8.81331	30	115	0.619068	0.470966	1.63707	0.0384738	0.760767

## Sheet: C40 VS C20
ID	Peak	Similarity	RT	Count	Mass	MEAN C20	MEAN C40	VIP	P-VALUE	FOLD CHANGE C40 VS C20
465	citric acid	914.5	10.2683	30	273	0.121986	0.0504447	1.91425	0.0444222	0.413527
563	noradrenaline	574.333	12.0163	30	174	0.00105832	0.00160535	2.12453	0.0156876	1.51689
76	glycine 1	884.5	5.80544	30	102	0.139952	0.0850713	2.06459	0.0441881	0.60786
131	malonic acid 1	600.828	6.39066	29	174	0.00205775	0.00142592	2.31731	0.0045045	0.692948
160	oxamic acid	563.033	6.78286	30	189	1.27623	1.87561	2.56313	0.00521352	1.46965
257	3-Methylglutaric Acid	329.333	7.96507	25	143	0.000224391	0.000452941	2.25593	0.0213156	2.01854
